# Supplementary material for: Optimization of passive acoustic bedload monitoring in rivers by signal inversion
Source: Copernicus journal article supplement (doi:10.5194/esurf-12-117-2024), 2024-01-11
Supplement: Supplementary file 1 [file esurf-12-117-2024-supplement.pdf]

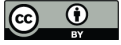

*Supplement of*

## **Optimization of passive acoustic bedload monitoring in rivers by signal inversion**

**Mohamad Nasr et al.**

*Correspondence to:* Mohamad Nasr ([mohamadnshr94@gmail.com](mailto:mohamadnshr94@gmail.com))

The copyright of individual parts of the supplement might differ from the article licence.

**Additional Supporting Information (Files uploaded separately)**

Recording samples and bedload flux data are presented in (Nasr, Mohamad; Johannot, Adele ; Geay, Thomas ; Zanker, Sebastien ; Recking, Alain; Le Guern, Jules (2022), “Optimization of passive acoustic bedload monitoring in rivers by signal inversion ”, Mendeley Data, V1, doi: 10.17632/vygy6tsy5n.1)

## S1. Measured and inversed acoustic profiles

This section presents the dataset for the global calibration curves (Geay et al., 2020; Nasr et al., 2023) and the inversed global calibration curve presented section 6.2 in the manuscript.

**Table S1.** A summary of the measured sites of and their corresponding characteristics. Where S is the local slope of the river, W is the width of the river section,  $\alpha_{\lambda_s}$  is the attenuation coefficient for the spherical model, H is the average water level, V is the flow velocity,  $\bar{q}_s$  and  $\bar{P}$  are the cross-sectional average specific bedload flux and acoustic power respectively.

| River            | Location    | S<br>(m/m) | W<br>(m) | $\alpha_{\lambda_s}$ | H<br>(m) | V<br>(m/s) | Bedload<br>GSD<br>$D_{50}$<br>(mm) | $\bar{q}_s$<br>(g/s/m) | $\bar{P}$<br>( $10^{12} \mu Pa^2$ ) | $\bar{P}$ inversed<br>( $10^{12} \mu Pa^2/m^2$ ) |
|------------------|-------------|------------|----------|----------------------|----------|------------|------------------------------------|------------------------|-------------------------------------|--------------------------------------------------|
| Arc              | Chamousset  | 0.002      | 48       | $2 \cdot 10^{-4}$    | 1.6      | 1.9        | 33.7                               | 149.2                  | 316.1                               | 10.8                                             |
| Arve             | Bossons     | 0.0075     | 14       | 0.06                 | 1.35     | 2.01       | 1.4                                | 157.7                  | 14.06                               | 4.5                                              |
|                  |             |            |          |                      | 1.2      | 1.73       | 1.4                                | 60.1                   | 3.30                                | 1.05                                             |
|                  |             |            |          |                      | 1.22     | 2.1        | 1.6                                | 85.3                   | 9.5                                 | 0.58                                             |
| Garonne          | Pont Du Roy | 0.003      | 22       | 0.003                | 1.63     | 1.88       | 3.5                                | 58.9                   | 5.3                                 | 0.19                                             |
|                  | Saint-Béat  | 0.0041     | 32       | 0.006                | 1.25     | 2.31       | 3.5                                | 80.1                   | 45.8                                | 3.60                                             |
| Gave de Gavarnie | Villelongue | 0.003      | 27       | 0.003                | 0.7      | 1.70       | 1.9                                | 1.2                    | 1.97                                | 0.10                                             |
| Gave de Pau      | Ayzac-Ost   | 0.003      | 35.3     | 0.003                | 1.53     | 2.50       | 3.9                                | 41.0                   | 23.3                                | 1.02                                             |
| Giffre           | Samoëns     | 0.003      | 31       | 0.005                | 0.9      | 1.83       | 6.8                                | 328.2                  | 550.52                              | 37.3                                             |
|                  |             |            |          |                      | 0.72     | 1.4        | 3                                  | 28.7                   | 38.5                                | 1.5                                              |

| River      | Location                                | S<br>(m/m) | W<br>(m) | $\alpha_{\lambda,s}$ | H<br>(m) | V<br>(m/s) | Bedload<br>GSD<br>$D_{50}$<br>(mm) | $\bar{q}_s$<br>(g/s/m) | $\bar{P}$<br>( $10^{12} \mu Pa^2$ ) | $\bar{P}$ inversed<br>( $10^{12} \mu Pa^2/m^2$ ) |
|------------|-----------------------------------------|------------|----------|----------------------|----------|------------|------------------------------------|------------------------|-------------------------------------|--------------------------------------------------|
| GrandBuech | La Faurie                               | 0.007      | 13.5     | 0.02                 | 0.65     | 1.65       | 40.8                               | 30.8                   | 6.76                                | 0.36                                             |
|            |                                         |            |          |                      | 0.69     | 1.75       | 19.3                               | 16.9                   | 9.70                                | 0.74                                             |
|            |                                         |            |          |                      | 0.61     | 1.39       | 5.7                                | 1.3                    | 0.6                                 | 0.04                                             |
|            | Saint Julien<br>en Beauchêne            | 0.017      | 15.5     | 0.01                 | 0.92     | 3.0        | 37                                 | 2130                   | 2137                                | 606                                              |
| Isère      | Campus                                  | 0.0005     | 60       | $10^{-4}$            | 2.8      | 1.41       | 2.0                                | 32.7                   | 11.90                               | 0.58                                             |
| Moselle    | Bainville-aux-<br>Miroirs               | 0.0011     | 16       | 0.011                | 2.8      | 1.94       | 19.6                               | 379.3                  | 141.7                               | 12                                               |
|            |                                         |            |          |                      | 2.6      | 2          | -                                  | 356.5                  | 353.6                               | 23                                               |
|            |                                         |            |          |                      | 2        | 1.88       | -                                  | 92.8                   | 159.3                               | 9.9                                              |
| Romanche   | Le Bourg d<br>Oisans/Centre             | 0.0013     | 33       | $1.5 \cdot 10^{-4}$  | 1.2      | 1.39       | 0.9                                | 53.9                   | 33.4                                | 1.5                                              |
|            |                                         |            |          |                      | 1.18     | 1.6        | 1.2                                | 51.6                   | 41.7                                | 1.5                                              |
|            |                                         |            |          |                      | 1.64     | 1.9        | 0.9                                | 94.9                   | 51.1                                | 2.5                                              |
|            | Le Bourg<br>d'Oisans Pont<br>Rouge      | 0.0013     | 36       | $4.6 \cdot 10^{-4}$  | 1.46     | 1.4        | 5.5                                | 117.1                  | 32.7                                | 2.6                                              |
|            |                                         |            |          |                      | 1.59     | 1.5        | 26                                 | 58.5                   | 34.6                                | 1.8                                              |
| Sarenne    | Le Bourg-d<br>Oisans/ Pont de<br>Bassey | 0.0013     | 8        | $4.6 \cdot 10^{-4}$  | 0.44     | 1.05       | 3.3                                | 31.6                   | 3.4                                 | 0.10                                             |
|            |                                         |            |          |                      | 0.49     | 0.97       | 5.8                                | 32.4                   | 5.2                                 | 0.17                                             |
|            |                                         |            |          |                      | 0.46     | 0.92       | -                                  | 2.3                    | 1.4                                 | 0.06                                             |
|            | d'Oisans 3 Ponts                        | 0.0013     | 11       | 0.005                | 0.52     | 0.8        | 1.7                                | 38.8                   | 1                                   | 0.02                                             |
| Selves     | Le Puech                                | 0.025      | 10       | 0.14                 | 0.98     | 1.61       | 2.9                                | 14.3                   | 0.28                                | 0.09                                             |

| River      | Location        | S<br>(m/m) | W<br>(m) | $\alpha_{\lambda,s}$ | H<br>(m) | V<br>(m/s) | Bedload<br>GSD<br>$D_{50}$<br>(mm) | $\bar{q}_s$<br>(g/s/m) | $\bar{P}$<br>( $10^{12} \mu Pa^2$ ) | $\bar{P}$ inversed<br>( $10^{12} \mu Pa^2/m^2$ ) |
|------------|-----------------|------------|----------|----------------------|----------|------------|------------------------------------|------------------------|-------------------------------------|--------------------------------------------------|
| Séveraisse | Villar Loubière | 0.011      | 12.5     | 0.058                | 0.7      | 1.65       | 5.1                                | 75.4                   | 26.8                                | 2.76                                             |
|            |                 |            |          |                      | 0.75     | 1.53       | 11.3                               | 41.1                   | 11.9                                | 1.55                                             |
|            |                 |            |          |                      | 0.76     | 1.63       | 38.8                               | 48.2                   | 33.2                                | 4.71                                             |
|            |                 |            |          |                      | 0.88     | 1.57       | 54.3                               | 111.3                  | 50.9                                | 6.70                                             |
|            |                 |            |          |                      | 0.82     | 1.48       | 62.1                               | 63.7                   | 5.8                                 | 0.51                                             |
|            |                 |            |          |                      | 0.73     | 1.79       | 0.0                                | 11.9                   | 0.96                                | 0.17                                             |
|            |                 |            |          |                      | 0.75     | 2.28       | 28.9                               | 189.2                  | 76.8                                | 8.0                                              |
|            |                 |            |          |                      | 0.78     | 2.73       | 31.5                               | 956.7                  | 452                                 | 74.1                                             |
|            |                 |            |          |                      | 0.91     | 2.76       | 20.3                               | 289.8                  | 139.7                               | 54.7                                             |
|            |                 |            |          |                      | 1.01     | 2.68       | 36.1                               | 900.3                  | 401.1                               | 299.1                                            |
|            | 0.81            | 2          | 42.6     | 661.1                | 294.8    | 47.6       |                                    |                        |                                     |                                                  |
|            | La Chapelle     | 0.0145     | 14       | 0.02                 | 0.46     | 2.06       | 0.0                                | 44.9                   | 3.8                                 | 0.17                                             |
|            |                 |            |          |                      | 0.36     | 2.03       | 23.4                               | 74.9                   | 16.6                                | 0.46                                             |
|            |                 |            |          |                      | 0.37     | 1.56       | 0.0                                | 8.7                    | 1.6                                 | 0.06                                             |

## S2 Attenuation coefficient

In this section we present a river slope-based empirical equation to predict the attenuation coefficient of rivers. The attenuation coefficients measured are best correlated with the local slope of the river (Geay et al., 2019). The fitted relations between slope and attenuation coefficient for both cylindrical ( $\alpha_{\lambda s}$ ) and spherical ( $\alpha_{\lambda s}$ ) model are as follows:

$$\alpha_{\lambda s} = 11.13 \cdot S^{1.12} \quad (S1)$$

$$\alpha_{\lambda s} = 1720 \cdot S^{2.28} \quad (S2)$$

The data supporting these empirical equations are presented in Table S2.

**Table S2.** The data for reach river used to fit the empirical formulas in Eq. (S1) and Eq. (S2).

| River                        | Slope (m/m) | $\alpha_{\lambda s}$ | $\alpha_{\lambda s}$ |
|------------------------------|-------------|----------------------|----------------------|
| Arve (Bossons)               | 0.0075      | 0.057                | 0.095                |
| Giffre                       | 0.003       | 0.005                | 0.0068               |
| GrandBuech (La Faurie)       | 0.007       | 0.02                 | 0.04                 |
| Isère (Campus)               | 0.0005      | $3 \cdot 10^{-5}$    | 0.0019               |
| Moselle                      | 0.0011      | 0.0011               | 0.0064               |
| Romanche (Bourg-d'Oisans)    | 0.0013      | $1.5 \cdot 10^{-4}$  | 0.0023               |
| Sarenne                      | 0.0013      | $4.6 \cdot 10^{-4}$  | 0.0078               |
| Selves                       | 0.025       | 0.14                 | 0.2                  |
| Séveraisse (Villar Loubière) | 0.011       | 0.058                | 0.08                 |
| Arc                          | 0.002       | $1.6 \cdot 10^{-4}$  | 0.0046               |
| Romanche (Pont Rouge)        | 0.0013      | $3.7 \cdot 10^{-4}$  | 0.0047               |
| Loire                        | 0.0002      | $\sim 0$             | 0.049                |
| 'Veneon                      | 0.011       | 0.033                | 0.012                |
| IsereGresy                   | 0.0018      | 0.003                | 0.0052               |
| Laysse                       | 0.001       | 0.0007               | 0.095                |

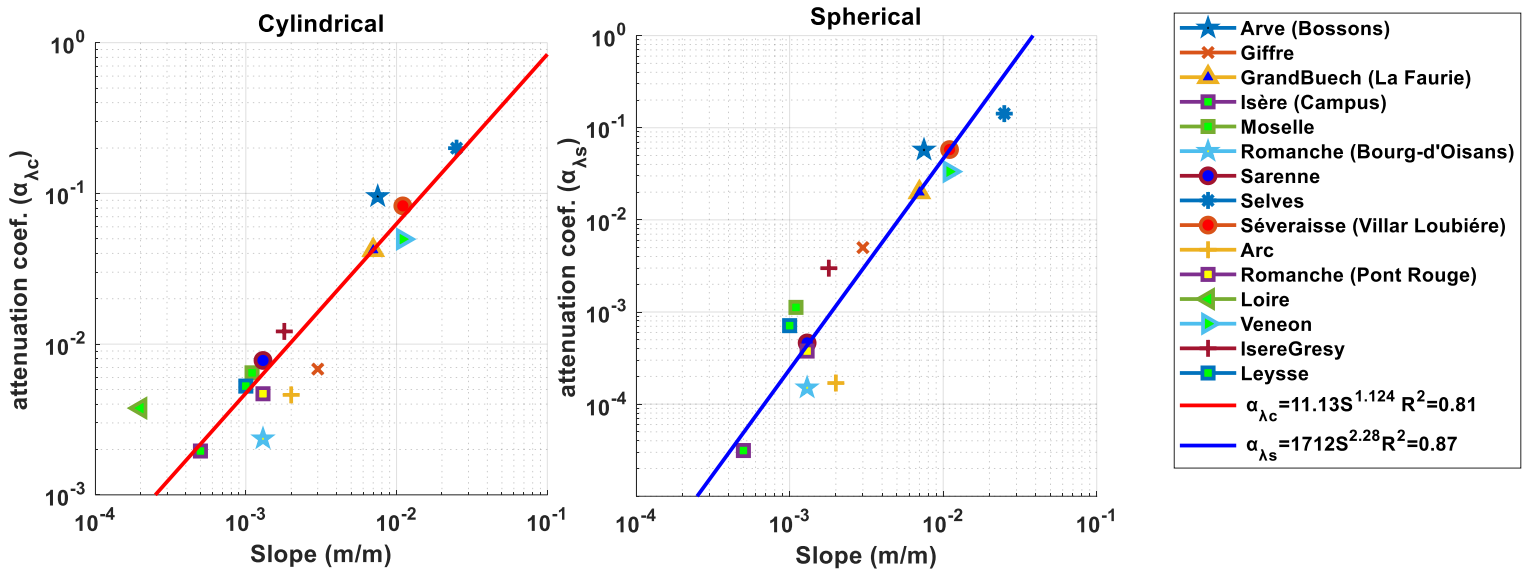

**Figure S1.** Relation between the local slope of the river and the attenuation coefficient for the cylindrical model (left) and spherical model (right) (Nasr, 2023).

## Reference

- Geay, T., Michel, L., Zanker, S., & Rigby, J. R. (2019). Acoustic wave propagation in rivers: an experimental study. *Earth Surface Dynamics*, 7(2), 537–548. <https://doi.org/10.5194/esurf-7-537-2019>
- Geay, T., Zanker, S., Misset, C., & Recking, A. (2020). Passive Acoustic Measurement of Bedload Transport: Toward a Global Calibration Curve? *Journal of Geophysical Research: Earth Surface*, 125(8), e2019JF005242. <https://doi.org/10.1029/2019JF005242>
- Nasr, M. (2023). *Development of an acoustic method for bedload transport measurement in rivers*. Université Grenoble Alpes.
- Nasr, M., Johannot, A., Geay, T., Zanker, S., Le Guern, Jules., & Recking, A. (2023). Passive Acoustic Monitoring of Bedload with Drifted Hydrophone. *Journal of Hydraulic Engineering*. <https://doi.org/10.1061/JHEND8/HYENG-13438>
